# Supplementary material for: Reliability of mobility measures in older medical patients with cognitive impairment
Source: PubMed Central journal article supplement (PMC6343264; doi:10.1186/s12877-019-1036-z), 2019-01-23
Supplement: 12877_2019_1036_MOESM2_ESM.pdf [file 12877_2019_1036_MOESM2_ESM.pdf]

## Additional File 2: Test-retest reliability of subscales of measurement instruments of mobility in 65 older acute medical patients with cognitive impairment

|                                                                                                                                                                                                                                                                                                                                                                                                                                                                                                                                                                                                                                                   | HABAM balance     | HABAM transfer  | HABAM mobility              | POMA balance                | POMA gait                   |     |
|---------------------------------------------------------------------------------------------------------------------------------------------------------------------------------------------------------------------------------------------------------------------------------------------------------------------------------------------------------------------------------------------------------------------------------------------------------------------------------------------------------------------------------------------------------------------------------------------------------------------------------------------------|-------------------|-----------------|-----------------------------|-----------------------------|-----------------------------|-----|
| Scale range and unit                                                                                                                                                                                                                                                                                                                                                                                                                                                                                                                                                                                                                              | 0 – 21 points     | 0 - 18 points   | 0 – 26 points               | 0 - 16 points               | 0 - 12 points               |     |
| Mean ± SD score 1st measure                                                                                                                                                                                                                                                                                                                                                                                                                                                                                                                                                                                                                       | 10.7 ± 7.4        | 12.1 ± 6.2      | 11.4 ± 8.9                  | 6.9 ± 53.9                  | 3.6 ± 3.8                   |     |
| Mean ± SD score 2nd measure                                                                                                                                                                                                                                                                                                                                                                                                                                                                                                                                                                                                                       | 11.7 ± 7.6        | 12.1 ± 6.5      | 11.5 ± 9.1                  | 7.3 ± 6.1                   | 3.6 ± 3.9                   |     |
| Mean difference absolute (95% CI)                                                                                                                                                                                                                                                                                                                                                                                                                                                                                                                                                                                                                 | 1.0 (-0.3 to 1.7) | 0 (-0.4 to 0.4) | 0.1 (-0.3 to 0.4)           | 0.3 (0.0 to 0.7)            | 0.1 (-0.1 to 0.2)           |     |
| Mean difference relative to score of 1st measure                                                                                                                                                                                                                                                                                                                                                                                                                                                                                                                                                                                                  | 9%                | 0%              | <1%                         | 4%                          | 3%                          |     |
| P value for mean difference                                                                                                                                                                                                                                                                                                                                                                                                                                                                                                                                                                                                                       | <0.01             | 0.93            | 0.70                        | 0.06                        | 0.50                        |     |
| $\sigma^2_p$                                                                                                                                                                                                                                                                                                                                                                                                                                                                                                                                                                                                                                      | 52.411            | 39.655          | 80.419                      | 34.601                      | 14.529                      |     |
| $\sigma^2_o$                                                                                                                                                                                                                                                                                                                                                                                                                                                                                                                                                                                                                                      | 0.45              | 0               | 0                           | 0.041                       | 0                           |     |
| $\sigma^2_{\text{residual}}$                                                                                                                                                                                                                                                                                                                                                                                                                                                                                                                                                                                                                      | 4.242             | 1.07            | 0.826                       | 1.036                       | 0.264                       |     |
| ICC <sub>AGREEMENT</sub>                                                                                                                                                                                                                                                                                                                                                                                                                                                                                                                                                                                                                          | 0.92              | 0.97            | 0.99                        | 0.97                        | 0.98                        |     |
| 95% CI for ICC                                                                                                                                                                                                                                                                                                                                                                                                                                                                                                                                                                                                                                    | 0.86 to 0.95      | 0.96 to 0.98    | 0.98 to 0.99                | 0.95 to 0.98                | 0.97 to 0.99                |     |
| P value for ICC                                                                                                                                                                                                                                                                                                                                                                                                                                                                                                                                                                                                                                   | <0.001            | <0.001          | <0.001                      | <0.001                      | <0.001                      |     |
| SEM <sub>AGREEMENT</sub> (absolute value)                                                                                                                                                                                                                                                                                                                                                                                                                                                                                                                                                                                                         | 2.17              | 1.03            | 0.91                        | 1.04                        | 0.51                        |     |
| SEM <sub>AGREEMENT</sub> (relative to scale range)                                                                                                                                                                                                                                                                                                                                                                                                                                                                                                                                                                                                | 10.3%             | 5.7%            | 3.5%                        | 6.5%                        | 4.3%                        |     |
| SEM <sub>AGREEMENT</sub> (relative to mean 1st measure)                                                                                                                                                                                                                                                                                                                                                                                                                                                                                                                                                                                           | 20.3%             | 8.5%            | 8.0%                        | 15.1%                       | 14.2%                       |     |
| $\tau$ -correlation <sup>a</sup>                                                                                                                                                                                                                                                                                                                                                                                                                                                                                                                                                                                                                  | -0.02; P=0.83     | -0.09; P=0.41   | 0.18; P=0.09                | 0.34; P<0.01                | 0.47; P<0.01                |     |
| Normal distribution of differences <sup>b</sup>                                                                                                                                                                                                                                                                                                                                                                                                                                                                                                                                                                                                   | P<0.001           | P<0.001         | P<0.001                     | P<0.001                     | P<0.001                     |     |
| 95% LoA (log as function of X)                                                                                                                                                                                                                                                                                                                                                                                                                                                                                                                                                                                                                    | -4.7 to 6.7       | -2.9 to 2.9     | -0.18X + 0.1 to 0.18X + 0.1 | -0.34X + 0.3 to 0.34X + 0.3 | -0.24X + 0.1 to 0.24X + 0.1 |     |
| MDC <sub>90</sub>                                                                                                                                                                                                                                                                                                                                                                                                                                                                                                                                                                                                                                 | exact             | 5.0             | 2.4                         | 2.1                         | 2.4                         | 1.2 |
|                                                                                                                                                                                                                                                                                                                                                                                                                                                                                                                                                                                                                                                   | rounded up        | 5               | 3                           | 3                           | 3                           | 2   |
| MDC <sub>95</sub>                                                                                                                                                                                                                                                                                                                                                                                                                                                                                                                                                                                                                                 | exact             | 6.0             | 2.9                         | 2.5                         | 2.9                         | 1.4 |
|                                                                                                                                                                                                                                                                                                                                                                                                                                                                                                                                                                                                                                                   | rounded up        | 6               | 3                           | 3                           | 3                           | 2   |
| Abbreviations: HABAM = Hierarchical Assessment of Balance and Mobility; POMA = Performance Oriented Mobility Assessment; SD = standard deviation; CI = confidence interval; $\sigma^2_p$ = variance between patients; $\sigma^2_o$ = variance due to systematic differences between observations; $\sigma^2_{\text{residual}}$ = residual variance; ICC = intraclass correlation coefficient ; SEM = standard error of measurement; LoA = absolute limites of agreement with 95% confidence; X = test score; MDC <sub>90</sub> = minimal detectable change with 90% confidence; MDC <sub>95</sub> = minimal detectable change with 95% confidence |                   |                 |                             |                             |                             |     |
| <sup>a</sup> Kendall's Tau correlation between absolute difference and mean scores of two measures; <sup>b</sup> Shapirow Wilk test of Normality                                                                                                                                                                                                                                                                                                                                                                                                                                                                                                  |                   |                 |                             |                             |                             |     |
