# Supplementary material for: Reliability of mobility measures in older medical patients with cognitive impairment
Source: PubMed Central journal article supplement (PMC6343264; doi:10.1186/s12877-019-1036-z), 2019-01-23
Supplement: 12877_2019_1036_MOESM3_ESM.pdf [file 12877_2019_1036_MOESM3_ESM.pdf]

### Additional File 3: Agreement of the Barthel Index mobility subscale items

|                                                                         | Second measure (n) |    |    |    | Observed proportion of agreement (95% CI) |               |
|-------------------------------------------------------------------------|--------------------|----|----|----|-------------------------------------------|---------------|
|                                                                         | 0                  | 5  | 10 | 15 |                                           |               |
| <b>TRANSFER item; kappa = 0.90 (95% CI: 0.83–0.97); agreement = 58%</b> |                    |    |    |    |                                           |               |
| <b>First measure (n)</b>                                                | <b>0</b>           | 6  | 0  | 0  | 0                                         | 100% (52–100) |
|                                                                         | <b>5</b>           | 0  | 16 | 0  | 0                                         | 100% (76–100) |
|                                                                         | <b>10</b>          | 0  | 0  | 8  | 5                                         | 53% (27–78)   |
|                                                                         | <b>15</b>          | 0  | 0  | 2  | 28                                        | 80% (63–91)   |
| <b>GAIT item; kappa = 0.96 (95% CI: 0.92–1.00); agreement = 62%</b>     |                    |    |    |    |                                           |               |
| <b>First measure (n)</b>                                                | <b>0</b>           | 26 | 0  | 0  | 0                                         | 100% (84–100) |
|                                                                         | <b>5</b>           | 0  | 11 | 2  | 0                                         | 85% (54–97)   |
|                                                                         | <b>10</b>          | 0  | 0  | 16 | 0                                         | 84% (60–96)   |
|                                                                         | <b>15</b>          | 0  | 0  | 1  | 9                                         | 90% (54–99)   |
| <b>STAIRS item; kappa = 0.87 (95% CI: 0.77–0.97); agreement = 59%</b>   |                    |    |    |    |                                           |               |
| <b>First measure (n)</b>                                                | <b>0</b>           | 39 | 2  | 1  | na                                        | 93% (79–98)   |
|                                                                         | <b>5</b>           | 0  | 7  | 3  | na                                        | 58% (27–84)   |
|                                                                         | <b>10</b>          | 0  | 0  | 13 | na                                        | 76% (50–92)   |
| Abbreviations: CI = confidence interval; na = not applicable            |                    |    |    |    |                                           |               |
